# Supplementary material for: Cardioprotective Potential of Human Endothelial-Colony Forming Cells from Diabetic and Nondiabetic Donors
Source: MDPI journal article supplement (doi:10.3390/cells9030588), 2020-03-02
Supplement: s1 [file s1]

## **DATA SUPPLEMENT**

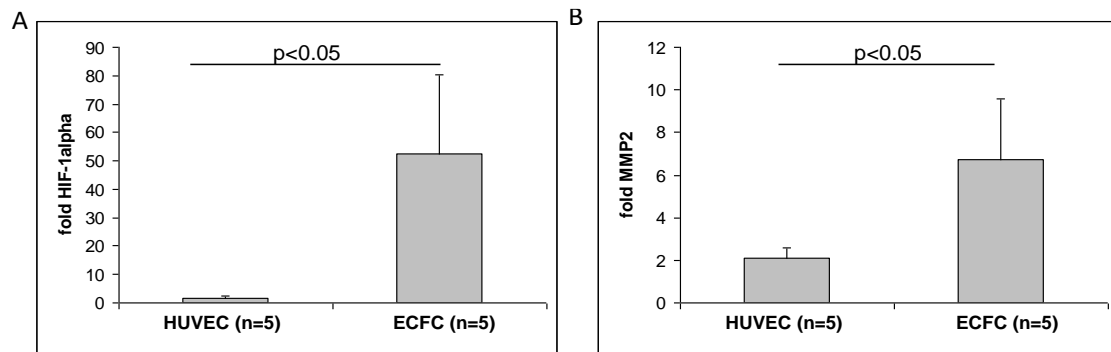

**Figure S1. ECFC expression of pro-angiogenic transcription factors *in vitro* assessed by RT-PCR. (A–D)** Bar graphs showing increased expression of pro-angiogenic transcription factors HIF-1alpha and MMP-2 in ECFCs compared to HUVEC cells assessed by RT-PCR *in vitro* (each n=5). Data represent mean  $\pm$  SEM.

## **Supplemental Methods**

### Method real-time PCR (RT-PCR)

huECFCs and HUVEC cells were grown to near confluence as described in the Methods Section. RT-PCR was performed as described previously [13].
